# Supplementary material
Source: PubMed Central journal article supplement (PMC3911091)
Supplement: AEM.03049-13_zam999105039so1.pdf [file AEM.03049-13_zam999105039so1.pdf]

**Table S1.** Pea aphids examined in this study and their infection with *Rickettsiella*

| No. | Local site (latitude, longitude)           | Host plant                | <i>Rickettsiella</i> infection |                  |
|-----|--------------------------------------------|---------------------------|--------------------------------|------------------|
|     |                                            |                           | Diagnostic PCR                 | Real-time PCR    |
| 1   | Sapporo, Hokkaido<br>(N 43.01, E 141.41)   | <i>Medicago sativa</i>    | 0/33 <sup>a</sup>              | 0/3 <sup>a</sup> |
|     |                                            | <i>Trifolium repens</i>   | 0/24                           | 0/2              |
|     |                                            | <i>Trifolium pratense</i> | 0/21                           | 0/2              |
| 2   | Shichinohe, Aomori<br>(N 40.71, E 141.13)  | <i>Medicago sativa</i>    | 0/20                           | 0/2              |
|     |                                            | <i>Trifolium repens</i>   | 0/34                           | 0/3              |
|     |                                            | <i>Trifolium pratense</i> | 0/15                           | 0/2              |
| 3   | Morioka, Iwate<br>(N 39.76, E 141.13)      | <i>Medicago sativa</i>    | 0/20                           | 0/2              |
|     |                                            | <i>Trifolium repens</i>   | 0/20                           | 0/2              |
|     |                                            | <i>Trifolium pratense</i> | 0/12                           | 0/2              |
| 4   | Toyama, Toyama<br>(N 36.63, E 137.12)      | <i>Medicago sativa</i>    | 0/55                           | 0/3              |
|     |                                            | <i>Vicia sativa</i>       | 0/34                           | 0/3              |
|     |                                            | <i>Trifolium repens</i>   | 0/61                           | 0/3              |
|     |                                            | <i>Trifolium pratense</i> | 0/46                           | 0/3              |
| 5   | Yotsukaido, Chiba<br>(N 35.69, E 140.15)   | <i>Medicago sativa</i>    | 0/27                           | 0/3              |
|     |                                            | <i>Vicia sativa</i>       | 0/40                           | 0/3              |
|     |                                            | <i>Trifolium repens</i>   | 0/20                           | 0/2              |
|     |                                            | <i>Trifolium pratense</i> | 0/20                           | 0/2              |
| 6   | Shiojiri, Nagano<br>(N 36.12, E 137.98)    | <i>Medicago sativa</i>    | 0/20                           | 0/2              |
|     |                                            | <i>Vicia sativa</i>       | 0/20                           | 0/2              |
|     |                                            | <i>Trifolium repens</i>   | 0/20                           | 0/2              |
|     |                                            | <i>Trifolium pratense</i> | 0/20                           | 0/2              |
| 7   | Okazaki, Aichi<br>(N 34.56, E 137.12)      | <i>Medicago sativa</i>    | 0/28                           | 0/3              |
|     |                                            | <i>Trifolium repens</i>   | 0/23                           | 0/2              |
|     |                                            | <i>Trifolium pratense</i> | 0/7                            | 0/2              |
| 8   | Nagakute, Aichi<br>(N 35.16, E 137.07)     | <i>Medicago sativa</i>    | 0/27                           | 0/3              |
|     |                                            | <i>Vicia sativa</i>       | 0/18                           | 0/2              |
|     |                                            | <i>Trifolium repens</i>   | 0/52                           | 0/3              |
| 9   | Bizen, Okayama<br>(N 34.44, E 134.11)      | <i>Medicago sativa</i>    | 0/2                            | 0/2              |
|     |                                            | <i>Vicia sativa</i>       | 0/20                           | 0/2              |
|     |                                            | <i>Trifolium repens</i>   | 0/28                           | 0/3              |
| 10  | Tottori, Tottori<br>(N 35.23, E 134.12)    | <i>Vicia sativa</i>       | 0/20                           | 0/2              |
|     |                                            | <i>Trifolium repens</i>   | 0/20                           | 0/2              |
|     |                                            | <i>Trifolium pratense</i> | 0/19                           | 0/2              |
| 11  | Matsue, Shimane<br>(N 35.45, E 133.09)     | <i>Medicago sativa</i>    | 0/12                           | 0/2              |
|     |                                            | <i>Vicia sativa</i>       | 0/20                           | 0/2              |
|     |                                            | <i>Trifolium repens</i>   | 0/20                           | 0/2              |
|     |                                            | <i>Trifolium pratense</i> | 0/20                           | 0/2              |
| 12  | Kitakyushu, Fukuoka<br>(N 32.48, E 130.54) | <i>Medicago sativa</i>    | 0/20                           | 0/2              |
|     |                                            | <i>Vicia sativa</i>       | 0/52                           | 0/3              |
|     |                                            | <i>Trifolium repens</i>   | 0/31                           | 0/3              |
|     |                                            | <i>Trifolium pratense</i> | 0/11                           | 0/2              |
| 13  | Nishihara, Kumamoto<br>(N 32.40, E 130.60) | <i>Vicia sativa</i>       | 0/11                           | 0/2              |
|     |                                            | <i>Trifolium repens</i>   | 0/11                           | 0/2              |
|     |                                            | <i>Trifolium pratense</i> | 0/12                           | 0/2              |
| 14  | Miyazaki, Miyazaki<br>(N 31.49, E 131.26)  | <i>Vicia sativa</i>       | 0/7                            | 0/2              |
|     |                                            | <i>Trifolium repens</i>   | 0/20                           | 0/2              |

<sup>a</sup> Number of *Rickettsiella*-infected insects/number of insects examined.

**Table S2.** Primers and probes used in this study

| Target symbiont                                       | Target gene | Primer or Probe name | Sequence(5' -3')          | Product size (kb) / fluorechrome at 5' end | References* |
|-------------------------------------------------------|-------------|----------------------|---------------------------|--------------------------------------------|-------------|
| <b>Primers for cloning and sequencing</b>             |             |                      |                           |                                            |             |
| Eubacteria                                            | 16S rRNA    | 16SA1                | AGAGTTTGATCMTGGCTCAG      | 1.5                                        | 1           |
|                                                       |             | 16SB1                | TACGGYTACCTTGTACGACTT     |                                            | 1           |
|                                                       | 16S rRNA    | 16SA1                | AGAGTTTGATCMTGGCTCAG      | 0.94                                       | 1           |
|                                                       |             | $\gamma$ 940R        | ACATGCTCCACCGCTTGTG       |                                            | 2           |
| <b>Primers for specific PCR detection<sup>†</sup></b> |             |                      |                           |                                            |             |
| <i>Buchnera</i>                                       | 16S rRNA    | Buch16S1F            | GAGCTTGCTCTCTTTGTCGGCAA   | 0.43                                       | 3           |
|                                                       |             | Buch16S1R            | CTTCTGCGGGTAACGTCACGAA    |                                            | 3           |
| <i>Serratia</i>                                       | 16S rRNA    | 16SA1                | AGAGTTTGATCMTGGCTCAG      | 0.48                                       | 1           |
|                                                       |             | PASScomp             | GCAATGTCTTATTAACACAT      |                                            | 4           |
| <i>Regiella</i>                                       | 16S rRNA    | U99F                 | ATCGGGGAGTAGCTTGCTAC      | 0.22                                       | 5           |
|                                                       |             | 16SB4                | CTAGAGATCGTCGCTAGGTA      |                                            | 6           |
| <i>Hamiltonella</i>                                   | 16S rRNA    | PABSF                | AGCACAGTTTACTGAGTTCA      | 0.22                                       | 5           |
|                                                       |             | 16SB4                | CTAGAGATCGTCGCTAGGTA      |                                            | 6           |
| <i>Rickettsiella</i>                                  | 16S rRNA    | RCL16S-211F          | GGGCCTTGCGCTCTAGGT        | 0.26                                       | 7           |
|                                                       |             | RCL16S-470R          | TGGGTACCGTCACAGTAATCGA    |                                            | 7           |
|                                                       | <i>gyrB</i> | RclGyrB-AF1          | GAGGCACTGAAATCCGCTTTTATCC | 0.12                                       | 7           |
|                                                       |             | RclGyrB-AR1          | GGCAACGCCAGAATTTAGGAATGAG |                                            | 7           |
| <b>Probes for <i>in situ</i> hybridization</b>        |             |                      |                           |                                            |             |
| <i>Buchnera</i>                                       | 16S rRNA    | ApisP2               | CCTCTTTTGGGTAGATCC        | AlexaFluor 488 or 555                      | 8           |
| <i>Rickettsiella</i>                                  | 16S rRNA    | RCL1252R             | TCGCGGGTTGGCTTCCT         | AlexaFluor 555                             | 7           |
| <i>Hamiltonella</i>                                   | 16S rRNA    | BTH                  | CCAGATTCACAGACTTTACTCA    | AlexaFluor 488                             | 9           |

\* References: 1, Fukatsu and Nikoh (1998) *Appl. Environ. Microbiol.* 64, 3599; 2, this study; 3, Tsuchida *et al.* (2002) *Mol. Ecol.* 11, 2123; 4, Fukatsu *et al.* (2000) *Appl. Environ. Microbiol.* 66, 2748; 5, Sandström *et al.* (2001) *Mol. Ecol.* 10, 217; 6, Tsuchida *et al.* (2005) *Microb. Ecol.* 49, 126; 7, Tsuchida *et al.* (2010) *Science* 330, 1102; 8, Koga *et al.* (2003) *Proc. R. Soc. Lond., B, Biol. Sci.* 270, 2543; 9, Gottlieb *et al.* (2008) *FASEB J.* 22, 2591. <sup>†</sup> *Rickettsiella*-specific primer sets targeting 16S rRNA gene and *gyrB* gene were used for both diagnostic PCR and real-time PCR detection. The other primers were used for diagnostic PCR only.

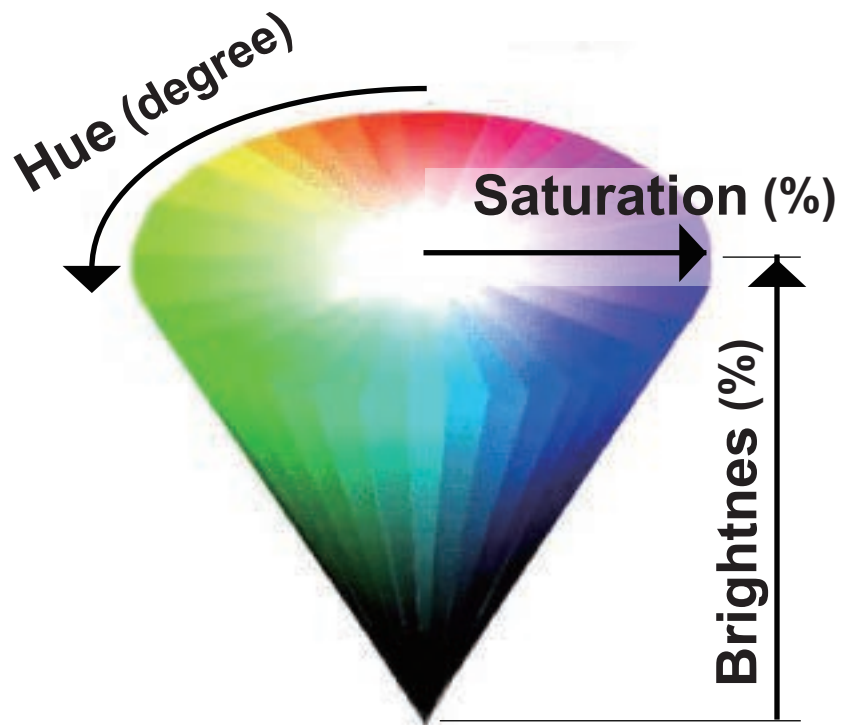

**Fig.S1.** HSB color model to evaluate aphid body color. According to this model, any color is represented by three factor, hue, saturation, and brightness. Hue indicates property of colors, measured in angular degrees starting and ending at red (0 or 360 degrees). Pure green hue is 120 degrees. Saturation represents the purity of the color, measured in percent from center of the cone (0% = no color) to the surface (100% = full color). Brightness is measured in percent from black (0) to white (100).

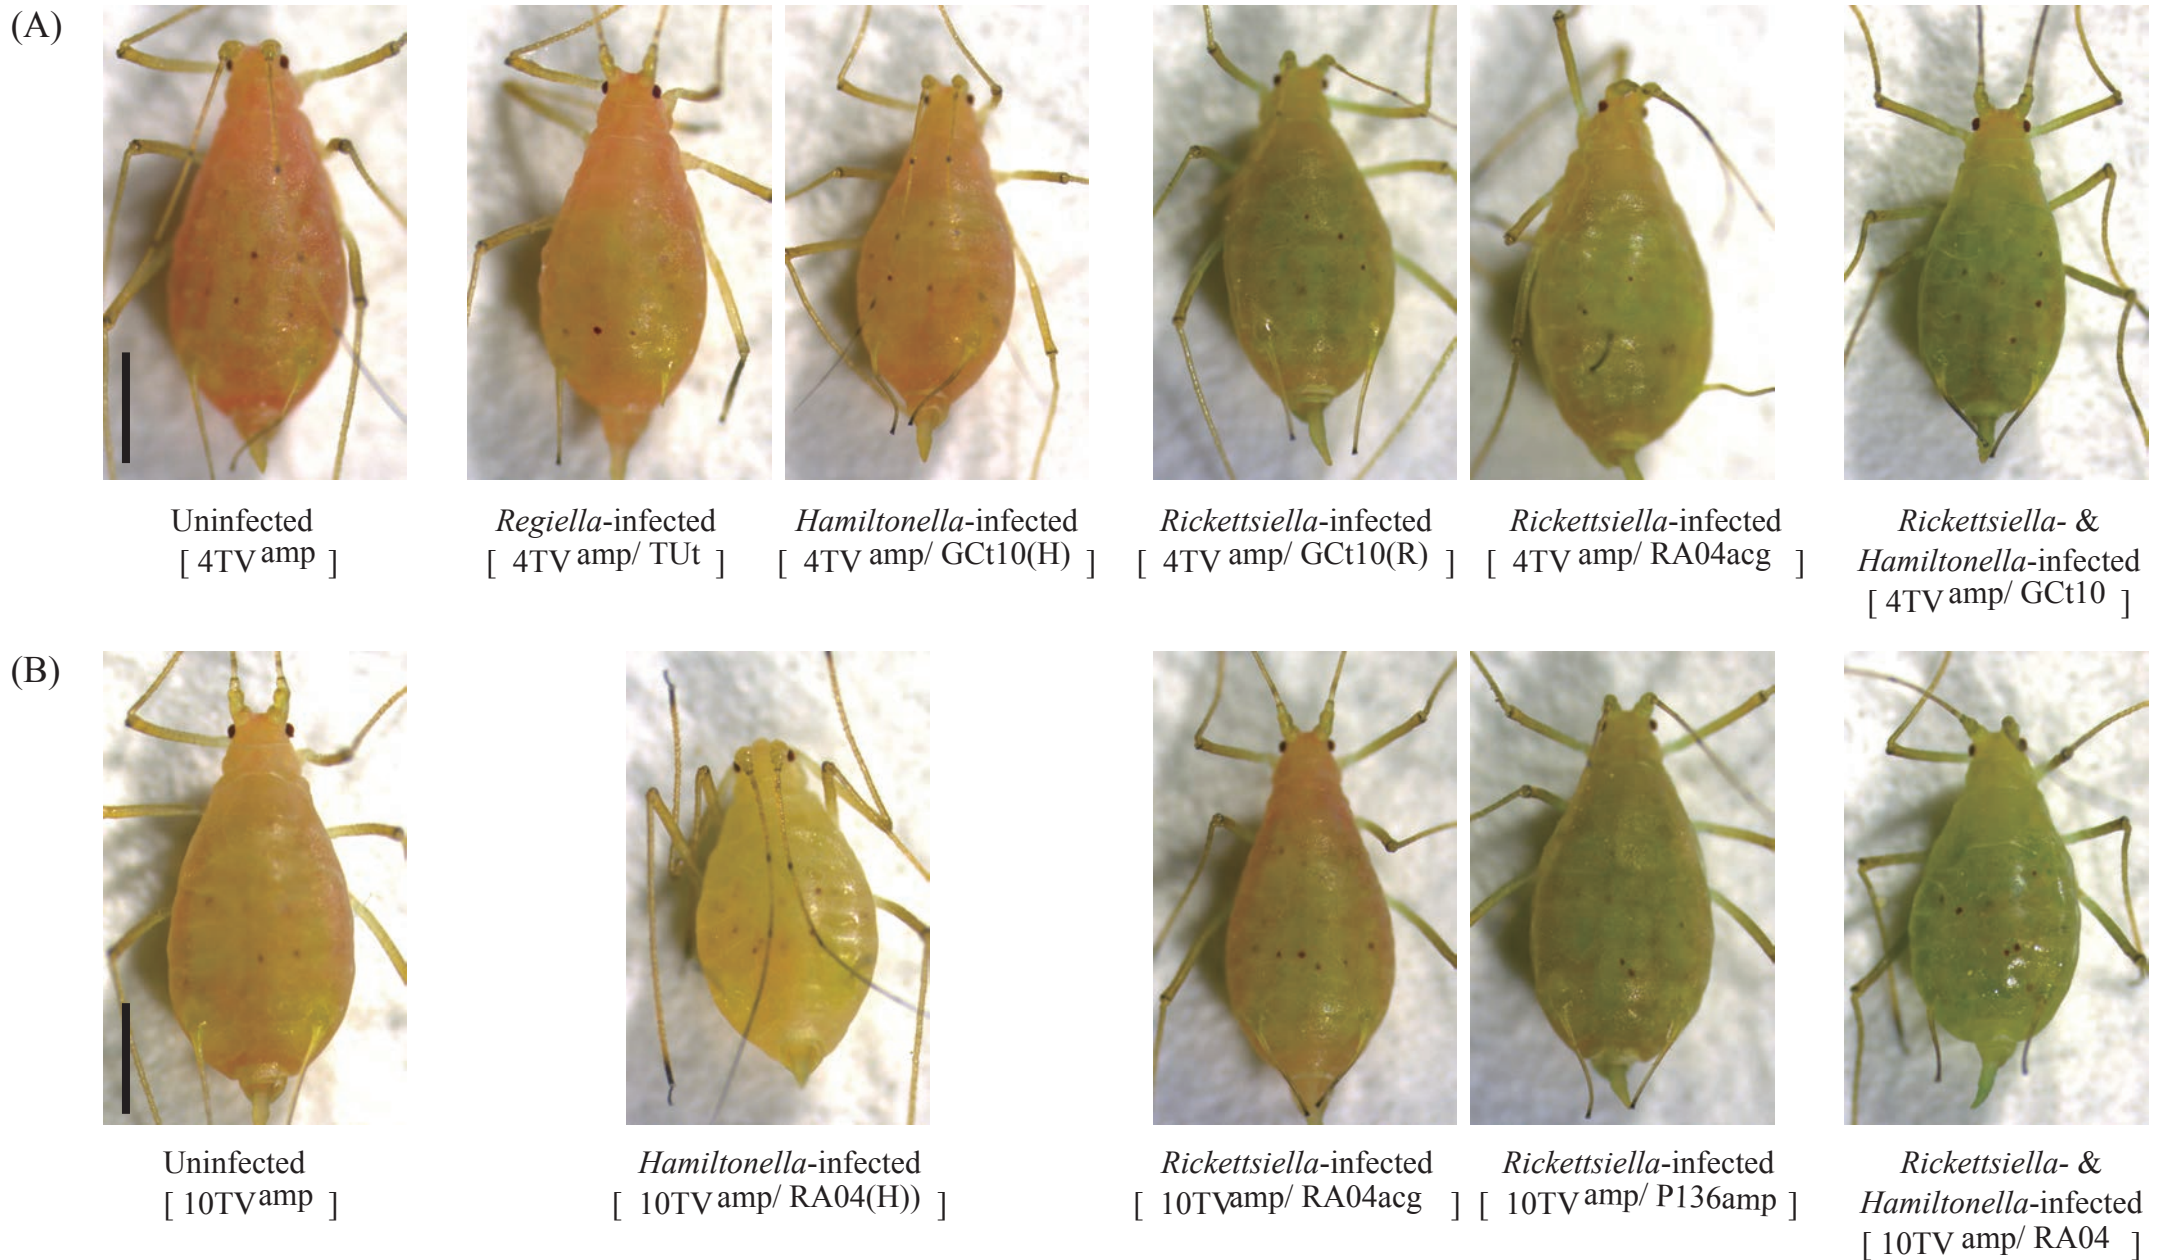

**Fig. S2.** Different color-changing effects of *Rickettsiella* strain and other facultative symbionts on the pea aphid of identical genetic background: (A) 4TV<sup>amp</sup> and (B) 10TV<sup>amp</sup>. Bars = 1 mm.
